# Supplementary material
Source: PubMed Central journal article supplement (PMC6741455)
Supplement: jin-0006-0253-s02.pdf [file jin-0006-0253-s02.pdf]

**Supplementary Table 1.** Covariation of microbiome structure with disease

| Dataset | Organism                                                                                                      | Supporting class* | Logarithmic LDA score | Wilcoxon p-value |
|---------|---------------------------------------------------------------------------------------------------------------|-------------------|-----------------------|------------------|
| skin    | Bacteria.Actinobacteria.Actinobacteria.Actinomyetales.Corynebacteriaceae.Corynebacterium.kroppenstedtii       | CMC               | 4.631622151           | 0.003756472      |
| skin    | Bacteria.Actinobacteria.Actinobacteria.Actinomyetales.Corynebacteriaceae.Corynebacterium.kroppenstedtii.69669 | CMC               | 4.629080995           | 0.003756472      |
| skin    | Bacteria.Actinobacteria.Actinobacteria.Actinomyetales.Intrasporangiaceae                                      | HIES              | 4.009979633           | 0.006217028      |
| skin    | Bacteria.Actinobacteria.Actinobacteria.Actinomyetales.Intrasporangiaceae.Knoellia                             | HIES              | 3.937748037           | 0.006217028      |
| skin    | Bacteria.Actinobacteria.Actinobacteria.Actinomyetales.Intrasporangiaceae.Knoellia.subterranea.581352          | HIES              | 3.930869749           | 0.006217028      |
| skin    | Bacteria.Actinobacteria.Actinobacteria.Actinomyetales.Intrasporangiaceae.Knoellia.subterranea                 | HIES              | 3.932277669           | 0.006217028      |
| skin    | Bacteria.Proteobacteria.Gammaproteobacteria.Pseudomonadales.Moraxellaceae                                     | HIES              | 5.129842085           | 0.006554949      |
| skin    | Bacteria.Actinobacteria.Actinobacteria.Actinomyetales.Corynebacteriaceae                                      | CMC               | 4.980612716           | 0.006924502      |
| skin    | Bacteria.Actinobacteria.Actinobacteria.Actinomyetales.Corynebacteriaceae.Corynebacterium                      | CMC               | 4.980612716           | 0.006924502      |
| skin    | Bacteria.Actinobacteria.Actinobacteria.Actinomyetales.Corynebacteriaceae.Corynebacterium.unclassified.320879  | control           | 4.391101978           | 0.008765038      |
| skin    | Bacteria.Proteobacteria.Gammaproteobacteria.Pseudomonadales                                                   | HIES              | 5.131274856           | 0.009058854      |
| skin    | Bacteria.Proteobacteria.Alphaproteobacteria.Rhodobacterales.Rhodobacteraceae.Paracoccus.unclassified          | HIES              | 3.901385341           | 0.009214815      |
| skin    | Bacteria.Actinobacteria.Actinobacteria.Actinomyetales.Corynebacteriaceae.Corynebacterium.unclassified.358019  | CMC               | 4.150393125           | 0.013717011      |
| skin    | Bacteria.Proteobacteria.Gammaproteobacteria.Pseudomonadales.Moraxellaceae.Acinetobacter.unclassified.2326547  | HIES              | 4.382565904           | 0.014699754      |
| skin    | Bacteria.Proteobacteria.Alphaproteobacteria.Rhodobacterales.Rhodobacteraceae.Paracoccus.unclassified.138528   | HIES              | 4.013770248           | 0.015610308      |
| skin    | Bacteria.Proteobacteria.Gammaproteobacteria                                                                   | HIES              | 5.070956172           | 0.024037738      |
| skin    | Bacteria.Actinobacteria.Actinobacteria.Actinomyetales.Micrococcaceae.Micrococcus                              | HIES              | 4.110845693           | 0.034231888      |
| skin    | Bacteria.Actinobacteria.Actinobacteria.Actinomyetales.Micrococcaceae.Micrococcus.unclassified                 | HIES              | 4.110845693           | 0.034231888      |
| skin    | Bacteria.Actinobacteria.Actinobacteria.Actinomyetales.Micrococcaceae.Micrococcus.unclassified.562170          | HIES              | 4.110845693           | 0.034231888      |
| skin    | Bacteria.Proteobacteria.Gammaproteobacteria.Pseudomonadales.Moraxellaceae.Acinetobacter                       | HIES              | 4.810948454           | 0.03753891       |
| skin    | Bacteria.Firmicutes.Bacilli.Lactobacillales.Carnobacteriaceae.Granulicatella.unclassified.162192              | CMC               | 4.293023004           | 0.039544867      |
| skin    | Bacteria.Firmicutes.Bacilli.Bacillales.Staphylococcaceae.Staphylococcus.unclassified.372254                   | control           | 3.993289587           | 0.04566228       |
| oral    | Bacteria.Firmicutes.Clostridia.Clostridiales.V                                                                | control           | 2.795815865           | 0.000936485      |

|      |                                                                                                                  |         |             |             |
|------|------------------------------------------------------------------------------------------------------------------|---------|-------------|-------------|
|      | eillonellaceae.unclassified.149091                                                                               |         |             |             |
| oral | Bacteria.Firmicutes.Clostridia.Clostridiales.V eillonellaceae.unclassified                                       | control | 3.784188862 | 0.000942324 |
| oral | Bacteria.Bacteroidetes.Bacteroidia.Bacteroid ales.Prevotellaceae.Prevotella.unclassified                         | control | 4.011245366 | 0.001565493 |
| oral | Bacteria.Firmicutes.Clostridia.Clostridiales.Cl ostridiaceae.unclassified.248474                                 | control | 2.907636024 | 0.003040672 |
| oral | Bacteria.Firmicutes.Clostridia.Clostridiales.L achnospiraceae.unclassified.71387                                 | control | 3.903916461 | 0.003127236 |
| oral | Bacteria.Firmicutes.Clostridia.Clostridiales.V eillonellaceae.Megasphaera.micronuciformis. 521650                | control | 2.681265457 | 0.003137152 |
| oral | Bacteria.Firmicutes.Clostridia.Clostridiales.V eillonellaceae.unclassified.511378                                | control | 3.726037001 | 0.003292464 |
| oral | Bacteria.Firmicutes.Clostridia.Clostridiales.V eillonellaceae.Megasphaera.micronuciformis                        | control | 2.731288951 | 0.003521693 |
| oral | Bacteria.Firmicutes.Clostridia.Clostridiales.V eillonellaceae.Megasphaera                                        | control | 2.731363316 | 0.003521693 |
| oral | Bacteria.Firmicutes.Clostridia.Clostridiales.V eillonellaceae.Veillonella.unclassified.58541 9                   | control | 3.171774184 | 0.003966761 |
| oral | Bacteria.Bacteroidetes.Bacteroidia.Bacteroid ales.Prevotellaceae                                                 | control | 4.9210381   | 0.004901658 |
| oral | Bacteria.Bacteroidetes.Bacteroidia.Bacteroid ales.Prevotellaceae.Prevotella                                      | control | 4.921925841 | 0.004901658 |
| oral | Bacteria.Bacteroidetes.Bacteroidia.Bacteroid ales._Paraprevotellaceae._Prevotella_unclas sified.93000            | control | 2.698987499 | 0.005365495 |
| oral | Bacteria.Bacteroidetes.Bacteroidia.Bacteroid ales.Prevotellaceae.Prevotella.melaninogenic a                      | control | 4.814944764 | 0.007779152 |
| oral | Bacteria.Firmicutes.Clostridia.Clostridiales.V eillonellaceae.Megasphaera.micronuciformis. 757622                | control | 2.778111922 | 0.009373243 |
| oral | Bacteria.Firmicutes.Clostridia.Clostridiales.L achnospiraceae.Butyrivibrio                                       | control | 2.752436035 | 0.009411545 |
| oral | Bacteria.Firmicutes.Clostridia.Clostridiales.L achnospiraceae.Butyrivibrio.unclassified                          | control | 2.757304765 | 0.009411545 |
| oral | Bacteria.Firmicutes.Clostridia.Clostridiales.L achnospiraceae.Butyrivibrio.unclassified.925 12                   | control | 2.753084586 | 0.009411545 |
| oral | Bacteria.Bacteroidetes                                                                                           | control | 4.905212964 | 0.009923977 |
| oral | Bacteria.Bacteroidetes.Bacteroidia.Bacteroid ales                                                                | control | 4.908512194 | 0.009923977 |
| oral | Bacteria.Bacteroidetes.Bacteroidia                                                                               | control | 4.912890896 | 0.009923977 |
| oral | Bacteria.Proteobacteria.Gammaproteobacter ia.Pasteurellales.Pasteurellaceae.Aggregatiba cter.unclassified        | control | 3.085494594 | 0.010040963 |
| oral | Bacteria.Proteobacteria.Gammaproteobacter ia.Pasteurellales.Pasteurellaceae.Aggregatiba cter.unclassified.891034 | control | 3.116502366 | 0.010040963 |
| oral | Bacteria.Bacteroidetes.Bacteroidia.Bacteroid ales.Prevotellaceae.Prevotella.unclassified.8 51822                 | control | 3.886011774 | 0.010141857 |
| oral | Bacteria.Firmicutes.Clostridia.Clostridiales.V eillonellaceae.Veillonella.parvula.3747214                        | control | 4.001562631 | 0.011405553 |
| oral | Bacteria.Firmicutes.Clostridia.Clostridiales.V eillonellaceae.Veillonella.parvula                                | control | 4.009219075 | 0.011405553 |
| oral | Bacteria.Actinobacteria.Actinobacteria.Actin omycetales.Actinomycetaceae.unclassified.3 03554                    | CMC     | 3.8292743   | 0.011533493 |
| oral | Bacteria.Firmicutes.Bacilli.Lactobacillales.Ca rnobacteriaceae.Granulicatella.unclassified.1 62192               | CMC     | 3.449059376 | 0.013393606 |
| oral | Bacteria.Fusobacteria.Fusobacteria.Fusobact                                                                      | control | 4.158679614 | 0.014559934 |

|      |                                                                                                               |         |             |             |
|------|---------------------------------------------------------------------------------------------------------------|---------|-------------|-------------|
|      | eriales.Leptotrichiaceae.Leptotrichia.unclassified.31235                                                      |         |             |             |
| oral | Bacteria.Fusobacteria.Fusobacteria.Fusobacteriales.Leptotrichiaceae.Leptotrichia.buccalis                     | CMC     | 2.647545894 | 0.014562617 |
| oral | Bacteria.Fusobacteria.Fusobacteria.Fusobacteriales.Leptotrichiaceae.Leptotrichia.buccalis.529861              | CMC     | 2.650151393 | 0.014562617 |
| oral | Bacteria.Proteobacteria.Gammaproteobacteria.Pasteurellales.Pasteurellaceae.Actinobacillus.unclassified.204197 | control | 3.143394828 | 0.014588926 |
| oral | Bacteria.Bacteroidetes.Bacteroidia.Bacteroidales.Prevotellaceae.Prevotella.unclassified.2185                  | control | 2.922596287 | 0.015069969 |
| oral | Bacteria.Bacteroidetes.Bacteroidia.Bacteroidales.Prevotellaceae.Prevotella.melaninogenica.525942              | control | 3.145587297 | 0.015318953 |
| oral | Bacteria.Firmicutes.Bacilli.Lactobacillales.Streptococcaceae.Streptococcus.unclassified.584109                | CMC     | 2.838383588 | 0.015421615 |
| oral | Bacteria.Firmicutes.Bacilli.Bacillales                                                                        | CMC     | 2.773508455 | 0.016422697 |
| oral | Bacteria.Bacteroidetes.Bacteroidia.Bacteroidales.Prevotellaceae.Prevotella.pallens.2222                       | control | 3.439991059 | 0.017381165 |
| oral | Bacteria.Firmicutes.Erysipelotrichi.Erysipelotrichales.Erysipelotrichaceae.Bulleidia.mooriei                  | control | 3.45231084  | 0.017433537 |
| oral | Bacteria.Firmicutes.Erysipelotrichi.Erysipelotrichales                                                        | control | 3.454168148 | 0.017433537 |
| oral | Bacteria.Firmicutes.Erysipelotrichi.Erysipelotrichales.Erysipelotrichaceae.Bulleidia                          | control | 3.453426515 | 0.017433537 |
| oral | Bacteria.Firmicutes.Erysipelotrichi.Erysipelotrichales.Erysipelotrichaceae                                    | control | 3.456228282 | 0.017433537 |
| oral | Bacteria.Firmicutes.Erysipelotrichi.Erysipelotrichales.Erysipelotrichaceae.Bulleidia.mooriei.4030370          | control | 3.456011374 | 0.017433537 |
| oral | Bacteria.Firmicutes.Erysipelotrichi                                                                           | control | 3.455809191 | 0.017433537 |
| oral | Bacteria.Proteobacteria.Gammaproteobacteria.Pasteurellales.Pasteurellaceae.Actinobacillus.unclassified        | control | 3.223958358 | 0.018716878 |
| oral | Bacteria.Firmicutes.Clostridia.Clostridiales.Clostridiaceae.Mogibacterium.unclassified                        | control | 3.197155442 | 0.020876302 |
| oral | Bacteria.Firmicutes.Clostridia.Clostridiales.Clostridiaceae.Mogibacterium.unclassified.46159                  | control | 3.198164419 | 0.020876302 |
| oral | Bacteria.Firmicutes.Clostridia.Clostridiales.Clostridiaceae.Mogibacterium                                     | control | 3.198218584 | 0.020876302 |
| oral | Bacteria.Bacteroidetes.Bacteroidia.Bacteroidales.Prevotellaceae.Prevotella.melaninogenica.958078              | control | 4.552690686 | 0.021376683 |
| oral | Bacteria.Firmicutes.Clostridia.Clostridiales.Peptococcaceae.Peptococcus.unclassified                          | control | 2.913498567 | 0.026326774 |
| oral | Bacteria.Firmicutes.Clostridia.Clostridiales.Peptococcaceae.Peptococcus                                       | control | 2.913459661 | 0.026326774 |
| oral | Bacteria.Firmicutes.Clostridia.Clostridiales.Peptococcaceae                                                   | control | 2.913309239 | 0.026326774 |
| oral | Bacteria.Firmicutes.Clostridia.Clostridiales.Peptococcaceae.Peptococcus.unclassified.68340                    | control | 2.913555887 | 0.026326774 |
| oral | Bacteria.Firmicutes.Clostridia.Clostridiales.Veillonellaceae.Veillonella.unclassified.573384                  | control | 3.315319947 | 0.026491697 |
| oral | Bacteria.Bacteroidetes.Bacteroidia.Bacteroidales.Prevotellaceae.Prevotella.nigrescens.747980                  | control | 2.77441066  | 0.026513127 |
| oral | Bacteria.Bacteroidetes.Bacteroidia.Bacteroid                                                                  | control | 2.778592926 | 0.026513127 |

|      |                                                                                                       |         |             |             |  |
|------|-------------------------------------------------------------------------------------------------------|---------|-------------|-------------|--|
|      | ales.Prevotellaceae.Prevotella.nigrescens                                                             |         |             |             |  |
| oral | Bacteria.Bacteroidetes.Bacteroidia.Bacteroidales._Paraprevotellaceae._Prevotella_unclassified.28952   | control | 3.540999404 | 0.027149441 |  |
| oral | Bacteria.Bacteroidetes.Bacteroidia.Bacteroidales._Paraprevotellaceae._Prevotella_unclassified         | control | 3.844412795 | 0.027866391 |  |
| oral | Bacteria.Bacteroidetes.Bacteroidia.Bacteroidales._Paraprevotellaceae_                                 | control | 3.828854597 | 0.027866391 |  |
| oral | Bacteria.Bacteroidetes.Bacteroidia.Bacteroidales._Paraprevotellaceae._Prevotella_                     | control | 3.837796335 | 0.027866391 |  |
| oral | Bacteria.Firmicutes.Clostridia.Clostridiales.Lachnospiraceae                                          | control | 4.317087739 | 0.028375054 |  |
| oral | Bacteria.Firmicutes.Bacilli.unclassified                                                              | HIES    | 3.38013454  | 0.028574358 |  |
| oral | Bacteria.Firmicutes.Bacilli.unclassified.1935703                                                      | HIES    | 3.369916452 | 0.028574358 |  |
| oral | Bacteria.Actinobacteria.Actinobacteria.Actinomycetales.Actinomycetaceae.Parascardovia                 | HIES    | 3.898448889 | 0.031745636 |  |
| oral | Bacteria.Actinobacteria.Actinobacteria.Actinomycetales.Actinomycetaceae.Parascardovia.unclassified    | HIES    | 3.895616362 | 0.031745636 |  |
| oral | Bacteria.Firmicutes.Bacilli.Lactobacillales.Streptococcaceae.Streptococcus.unclassified.736957        | CMC     | 3.233453905 | 0.032475389 |  |
| oral | Bacteria.Fusobacteria.Fusobacteria.Fusobacteriales.Fusobacteriaceae.Fusobacterium.unclassified.545299 | control | 2.86514049  | 0.032913364 |  |
| oral | Bacteria.Firmicutes.Clostridia.Coriobacteriales.Coriobacteriaceae.Atopobium.unclassified.132328       | control | 3.623768927 | 0.03457291  |  |
| oral | Bacteria.Firmicutes.Clostridia.Clostridiales.Veillonellaceae.Veillonella.parvula.4200871              | control | 3.581503403 | 0.038723223 |  |
| oral | Bacteria.Firmicutes.Bacilli.Bacillales.Staphylococcaceae                                              | CMC     | 2.726254296 | 0.039244631 |  |
| oral | Bacteria.Bacteroidetes.Bacteroidia.Bacteroidales._Paraprevotellaceae._Prevotella_unclassified.539347  | control | 3.235507946 | 0.039561609 |  |
| oral | Bacteria.Fusobacteria.Fusobacteria                                                                    | control | 4.622317736 | 0.040225051 |  |
| oral | Bacteria.Fusobacteria.Fusobacteria.Fusobacteriales                                                    | control | 4.622317006 | 0.040225051 |  |
| oral | Bacteria.Fusobacteria                                                                                 | control | 4.622317878 | 0.040225051 |  |
| oral | Bacteria.Bacteroidetes.Bacteroidia.Bacteroidales.Prevotellaceae.Prevotella.unclassified.239506        | control | 2.598316154 | 0.04365131  |  |
| oral | Bacteria.Bacteroidetes.Bacteroidia.Bacteroidales.Porphyromonadaceae.Tannerella.unclassified.254492    | control | 2.7245435   | 0.04384112  |  |
| oral | Bacteria.Bacteroidetes.Bacteroidia.Bacteroidales.Porphyromonadaceae.Tannerella.unclassified           | control | 2.709463453 | 0.04384112  |  |
| oral | Bacteria.Bacteroidetes.Bacteroidia.Bacteroidales.Porphyromonadaceae.Tannerella                        | control | 2.722788527 | 0.04384112  |  |
| oral | Bacteria.Firmicutes.Bacilli.Lactobacillales.Streptococcaceae.unclassified.525391                      | HIES    | 2.828860652 | 0.045464825 |  |
| oral | Bacteria.Firmicutes.Clostridia.Clostridiales.Clostridiaceae.unclassified                              | control | 2.887108295 | 0.045814835 |  |
| oral | Bacteria.Firmicutes.Clostridia.Coriobacteriales                                                       | control | 3.630703271 | 0.04796904  |  |
| oral | Bacteria.Firmicutes.Clostridia.Coriobacteriales.Coriobacteriaceae.Atopobium                           | control | 3.62399191  | 0.04796904  |  |
| oral | Bacteria.Firmicutes.Clostridia.Coriobacteriales.Coriobacteriaceae                                     | control | 3.627591274 | 0.04796904  |  |
| oral | Bacteria.Bacteroidetes.Bacteroidia.Bacteroidales.Prevotellaceae.Prevotella.nanceiensis.898309         | control | 3.396504271 | 0.048672048 |  |

---
