# Supplementary material
Source: PubMed Central journal article supplement (PMC6741455)

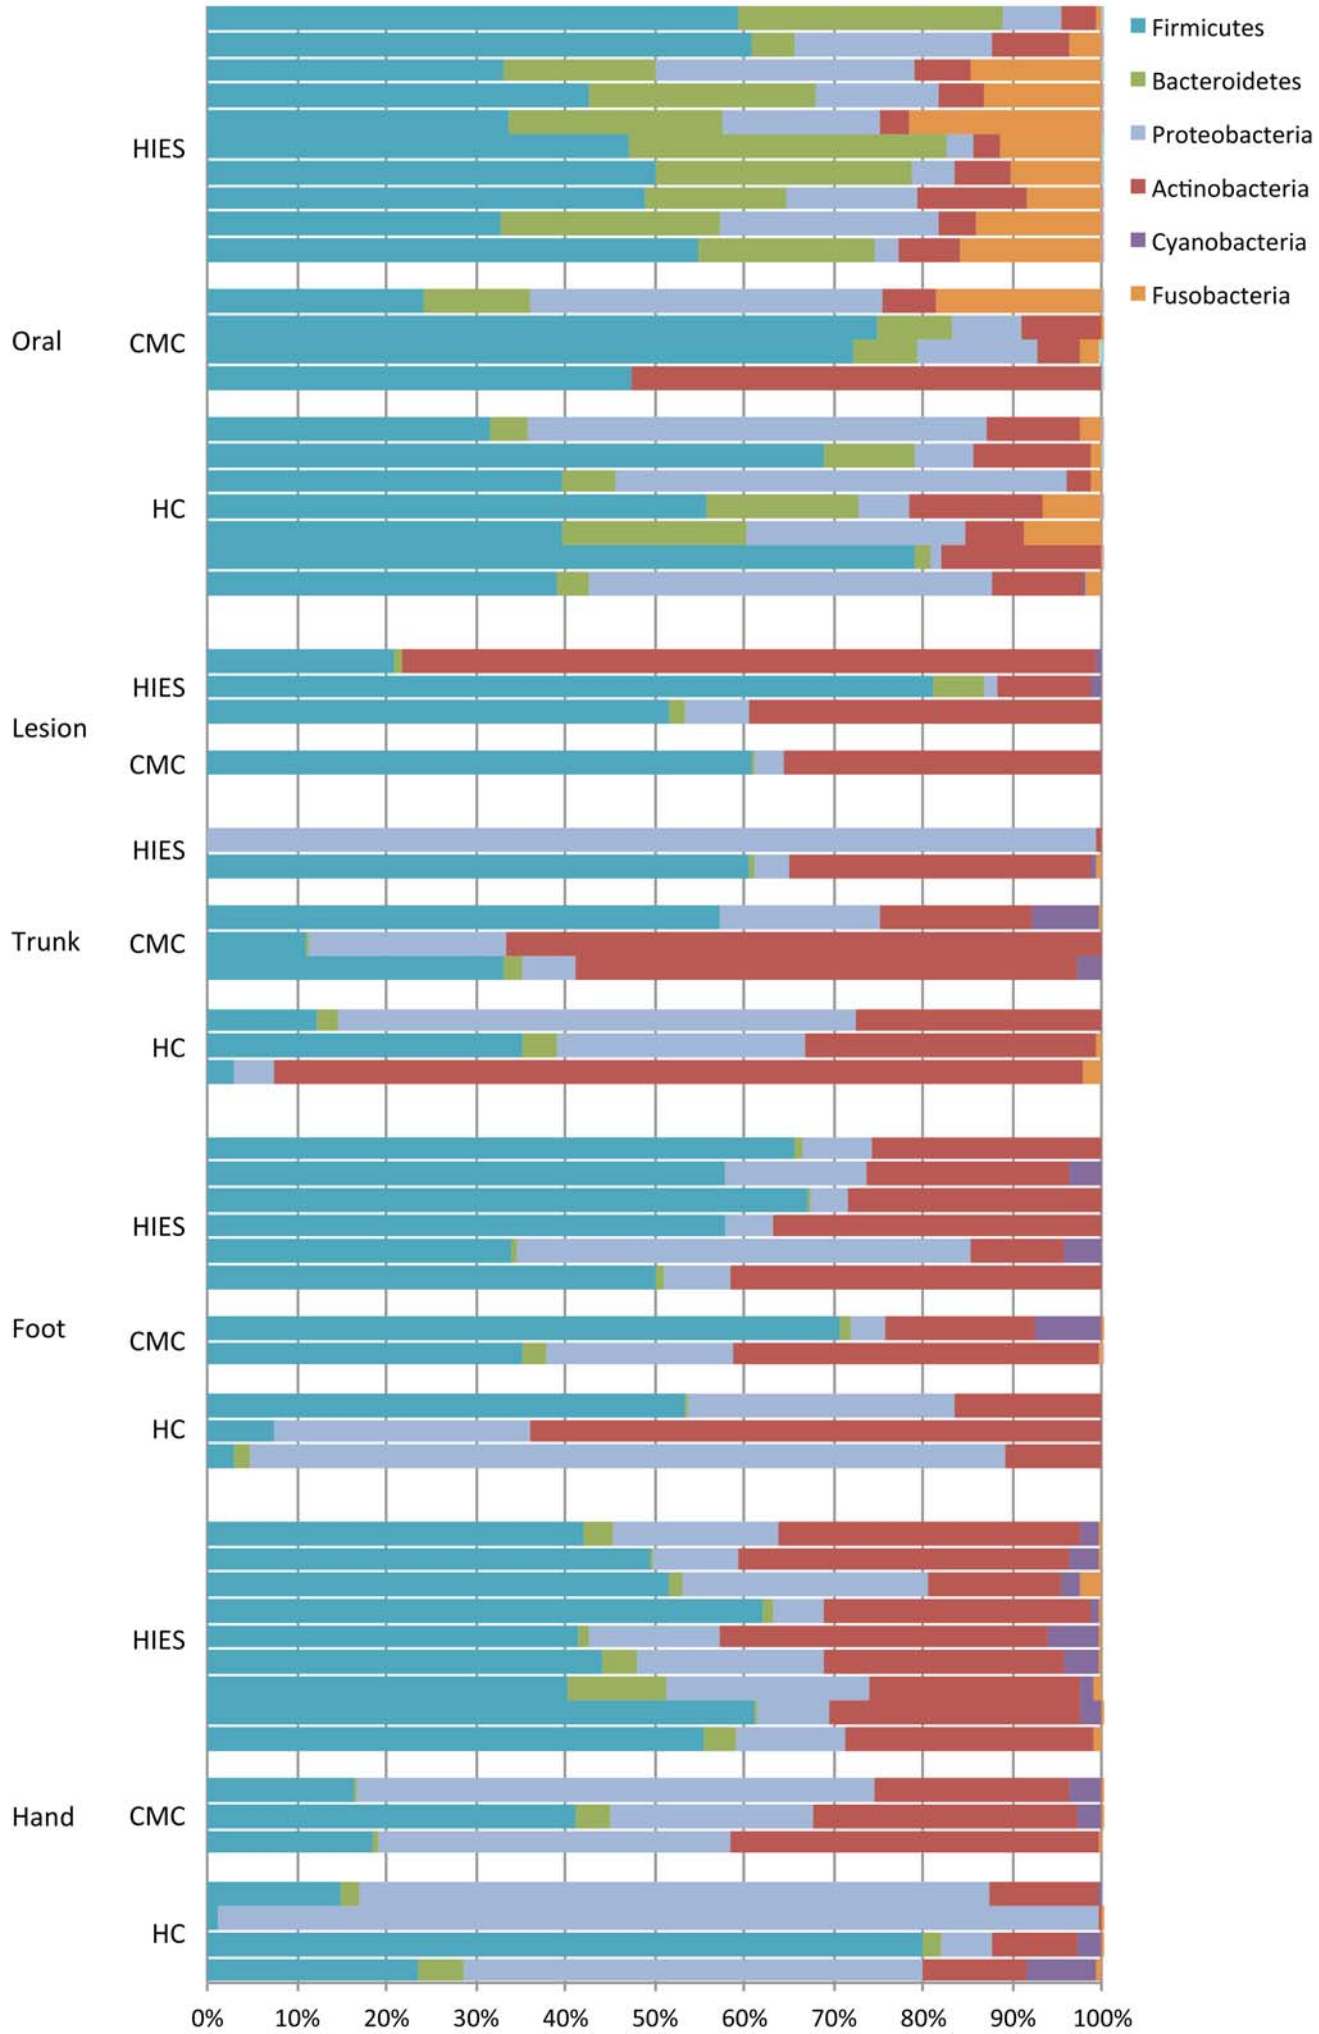

Supplement: jin-0006-0253-s01.pdf [file jin-0006-0253-s01.pdf]
